# Supplementary material for: Exenatide modulates tumor–endothelial cell interactions in human ovarian cancer cells
Source: PubMed Central journal article supplement — Endocr Connect. 2017 Oct 17;6(8):856–65. doi: 10.1530/EC-17-0294 (PMC5682419; doi:10.1530/ec-17-0294), 2017-10-17
Supplement: ec-6-856-s001.pdf [file ec-6-856-s001.pdf]

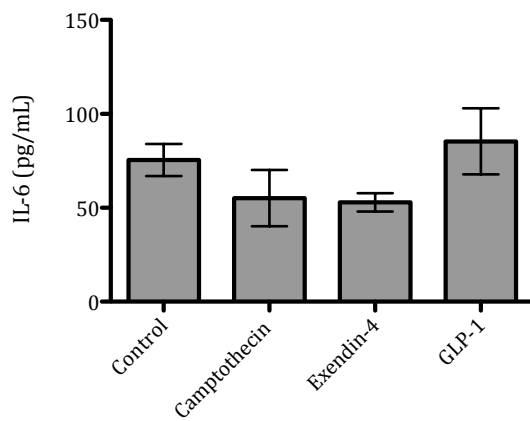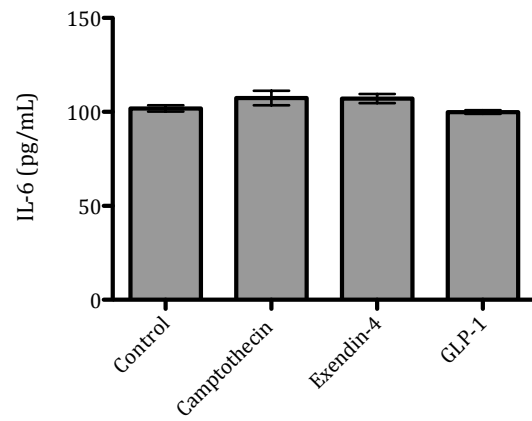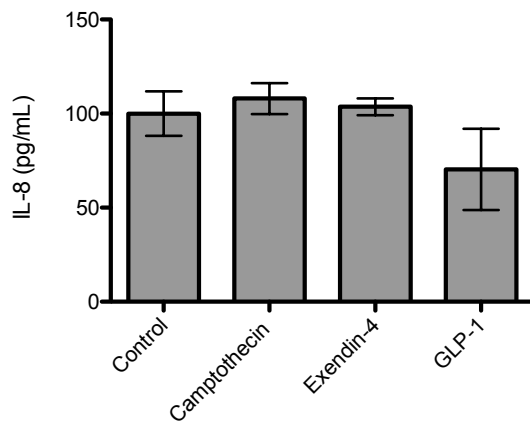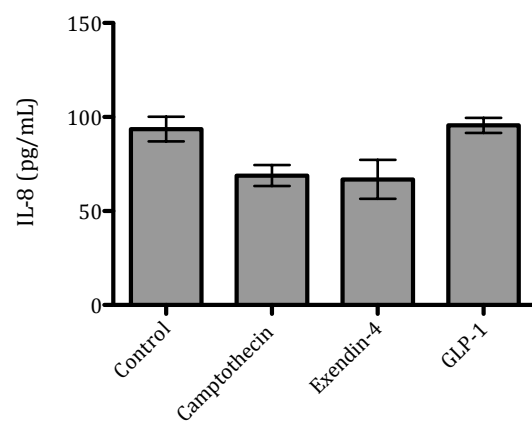

**Supplementary 1. Production of inflammatory cytokines IL-6 and IL-8 by ovarian cancer cells.** Medium protein concentration of IL-6 in SKOV-3 (A) and CAOV-3 (B) and IL-8 in SKOV-3 (C) and CAOV-3 (D) after 24 hour incubation with Camptothecin (100 nM), Exendin-4 (50 nM), and GLP-1 (100 nM). Mean values  $\pm$ SEM are shown. n=3-6 per group. \*p<0.05, \*\*p<0.01, \*\*\*p<0.001 TNF- $\alpha$  vs. different conditions. One-way ANOVA followed with Dunnett's *post-hoc*.
