# Supplementary material for: Exenatide modulates tumor–endothelial cell interactions in human ovarian cancer cells
Source: PubMed Central journal article supplement — Endocr Connect. 2017 Oct 17;6(8):856–65. doi: 10.1530/EC-17-0294 (PMC5682419; doi:10.1530/ec-17-0294), 2017-10-17
Supplement: ec-6-856-s002.pdf [file ec-6-856-s002.pdf]

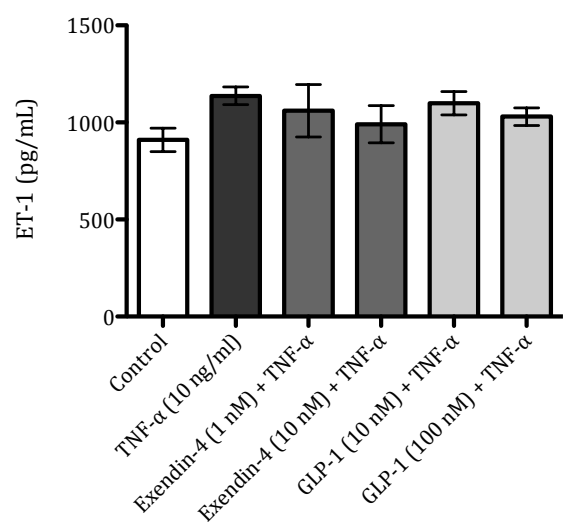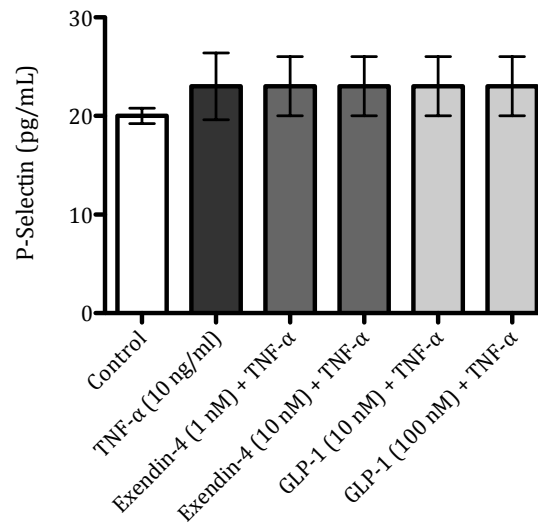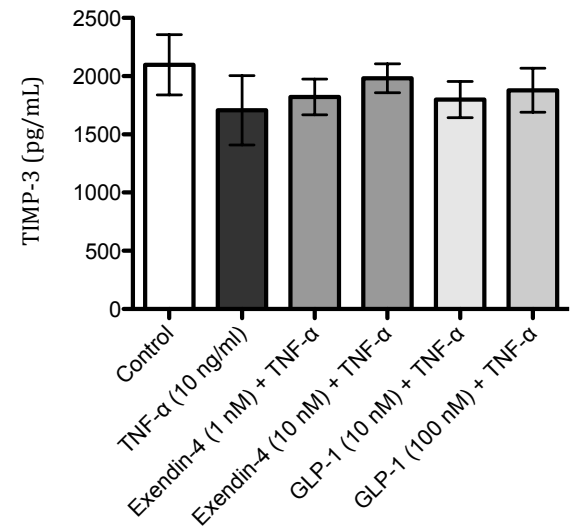

**Supplementary 2. Exendin-4 modulates endothelial cell response after TNF- $\alpha$  stimulation.** Iliac Artery Endothelial Cells (IAEC) were stimulated for 24 hours with TNF- $\alpha$  (10 ng/ml), Exendin-4 (1 nM and 10 nM), and GLP-1 (10 nM and 100 nM). Cell culture medium concentration of Endothelin-1 (ET-1) (A), P-selectin (B), TIMP-3 (C), Mean values  $\pm$ SEM are shown. n=6 per group \*p<0.05, \*\*p<0.01 TNF- $\alpha$  vs. different conditions. One-way ANOVA followed with Dunnett's *post-hoc*.
